# Supplementary material for: Maquiberry Cystatins: Recombinant Expression, Characterization, and Use to Protect Tooth Dentin and Enamel
Source: Biomedicines. 2023 May 4;11(5):1360. doi: 10.3390/biomedicines11051360 (PMC10216612; doi:10.3390/biomedicines11051360)
Supplement: Supplementary file 1 [file biomedicines-11-01360-s001.zip]

Archive with 5 entries (5 files):
- Figure S1.jpg
- Figure S2.jpg
- Figure S3.jpg
- Supplementary Figures - Souza et al. 2023.pdf
- Supplementary tables_Souza et al 2023.xlsx
