# Supplementary material for: Maquiberry Cystatins: Recombinant Expression, Characterization, and Use to Protect Tooth Dentin and Enamel
Source: Biomedicines. 2023 May 4;11(5):1360. doi: 10.3390/biomedicines11051360 (PMC10216612; doi:10.3390/biomedicines11051360)
Supplement: Supplementary file 1 [file biomedicines-11-01360-s001.zip › Supplementary tables_Souza et al 2023.xlsx]

## Sheet: Table S1
Table S1: Primer sequences used to amplify maquicystatins coding sequences. NdeI (CATATG) e SalI (GTCGAC) restriction sites are in bold.
Name	Primers
MaquiCPI-1	F: 5' ATTCATATGGGTGTGGAGGGTTTTGGGTC 3'
	R: 5' ATTGTCGACTTAATCGGTAGAAGGTGCGAAATG 3'
MaquiCPI-2	F: 5' ATTCATATGTGGAAAGATCAAATGCCCGG 3'
	R: 5' ATTGTCGACTTATCCAATGACAACCTTAAAAGAAG 3'
MaquiCPI-3	F: 5' ATTCATATGAGGATAGATCCTCTTGTCGG 3'
	R: 5' ATTGTCGACTTACACAACTTTAAAAGAAGTAAGATT 3'
MaquiCPI-4	F: 5' ATTCATATGGCAAGAGTGGGTGGTGTTAG 3'
	R: 5' ATTGTCGACCTAAGCAGTGGAGTCGGAAG 3'
MaquiCPI-5	F: 5' ATTCATATGGCCACCACCA CCACCGTCGG 3'
	R: 5' ATTGTCGACTCAGGAGTGGTCCGGCTCCA 3'
MaquiCPI-6	F: 5' ATTCATATGGGTCGTTGCAACGAAGACTT 3'
	R: 5' ATTGTCGACCTAATTCATATAAAACTTTCCTTC 3'
F: Foward
R: Reverse

## Sheet: Table S2
Table S2: Sequence characteristics from Aristotelia chilensis cystatins
Name	QxVxG		SNSL	ORF Size (pb)	Signal Peptide Cleavage	Mature proteins features
	QVVAG	QVVSG				Residues	MW (kDa)	pI
MaquiCPI-1		x		384	19-20 (CFC-GV)	109	12.15	8.27
MaquiCPI-2		x		375	29-30 (ISA-WK)	96	10.89	8.97
MaquiCPI-3		x		351	22-23 (ASA-RI)	95	10.37	5.80
MaquiCPI-4		x		303	-	101	11.06	5.83
MaquiCPI-5	x		x	612	-	204	22.76	6.06
MaquiCPI-6	x		x	672	21-22 (VEL-GR)	203	22.82	7.90

## Sheet: Table S3
Table S3: Plant cystatins expression yields in Escherichia coli (mg per liter of culture)
Nomenclature	Yield (mg)	Reference
Sugarcane (Saccharum officinarum) - CaneCPI-1	10	[15]
Sweet orange (Citrus sinensis) - CsinCPI-2	10	[18]
Clementine (Citrus clementina) - CClemCPI-2	10	[18]
Sugarcane (Saccharum officinarum) - CaneCPI-5	16	[25]
Prince's-feather (Amaranthus hypochondriacus) - AhCPI	266	[72]
Cowpea (Vigna unguiculata) - VuCys1	10	[84]
Cowpea (Vigna unguiculata) - VuCys2	22	[84]
Human (Homo sapiens) - Cystatin C	4	[98]
Rubber tree (Hevea brasiliensis) - HbCPI	30	[99]
Jelly fig (Ficus awkeotsang) - FaCYS	1.2	[100]
Pineapple (Ananas comosus) - AcCYS	63.7	[101]
Mouse-ear cress (Arabidopsis thaliana) - AtCYS1	3.6	[102]
Human (Homo sapiens) - Stefin B	15	[103]
Maqui (Aristotelia chilensis) - MaquiCPI-1	17.5	this work
Maqui (Aristotelia chilensis) - MaquiCPI-2	23.6	this work
Maqui (Aristotelia chilensis) - MaquiCPI-3	120	this work
Maqui (Aristotelia chilensis) - MaquiCPI-4	18.5	this work
Maqui (Aristotelia chilensis) - MaquiCPI-5	44.6	this work
15. Soares-Costa, A.; Beltramini, L.M.; Thiemann, O.H.; Henrique-Silva, F. A Sugarcane Cystatin: Recombinant Expression, Purification, and Antifungal Activity. Biochem. Biophys. Res. Commun. 2002, 296, 1194–1199, doi:10.1016/S0006-291X(02)02046-6.
18. Schneider, V.K.; da Silva Ferrara, T.F.; Rocha, S.V.; Santos-Júnior, C.D.; Neo-Justino, D.M.; da Cunha, A.F.; de Oliveira da Silva, J.P.M.; dos Santos Tersariol, I.L.; Carmona, A.K.; Henrique-Silva, F.; et al. Recombinant Expression, Characterization and Phylogenetic Studies of Novels Cystatins-like Proteins of Sweet Orange (Citrus sinensis) and Clementine (Citrus clementina). Int. J. Biol. M…
25. Santiago, A.C.; Khan, Z.N.; Miguel, M.C.; Gironda, C.C.; Soares-Costa, A.; Pelá, V.T.; Leite, A.L.; Edwardson, J.M.; Buzalaf, M.A.R.; Henrique-Silva, F. A New Sugarcane Cystatin Strongly Binds to Dental Enamel and Reduces Erosion. J. Dent. Res. 2017, 96, 1051–1057, doi:10.1177/0022034517712981.
72. Valdes-Rodriguez, S.; Cedro-Tanda, A.; Aguilar-Hernandez, V.; Cortes-Onofre, E.; Blanco-Labra, A.; Guerrero-Rangel, A. Recombinant Amaranth Cystatin (AhCPI) Inhibits the Growth of Phytopathogenic Fungi. Plant Physiol. Biochem. 2010, 48, 469–475, doi:10.1016/j.plaphy.2010.03.012.
84. Monteiro Júnior, J.E.; Valadares, N.F.; Pereira, H.D.; Dyszy, F.H.; da Costa Filho, A.J.; Uchôa, A.F.; de Oliveira, A.S.; da Silveira Carvalho, C.P.; Grangeiro, T.B. Expression in Escherichia coli of Cysteine Protease Inhibitors from Cowpea (Vigna unguiculata): The Crystal Structure of a Single-Domain Cystatin Gives Insights on Its Thermal and PH Stability. Int. J. Biol. Macromol. 2017, 102, …
98. Szymańska, A.; Radulska, A.; Czaplewska, P.; Grubb, A.; Grzonka, Z.; Rodziewicz-Motowidło, S. Governing the Monomer-Dimer Ratio of Human Cystatin c by Single Amino Acid Substitution in the Hinge Region. Acta Biochim. Pol. 2009, 56, 455–463.
99. Bangrak, P.; Chotigeat, W. Molecular Cloning and Biochemical Characterization of a Novel Cystatin from Hevea rubber Latex. Plant Physiol. Biochem. 2011, 49, 244–250, doi:10.1016/j.plaphy.2010.12.007.
100. Shyu, D.J.H.; Yong, Y.-M.; LU, H.-C.; Cheng, Y.-M.; Tzen, J.T.C.; Chou, W.-M. Cloning, Functional Expression and Characterization of a Phytocystatin Gene from Jelly Fig (Ficus awkeotsang Makino) Achenes. Bot. Stud. 2011, 52, 407–416.
101. Shu, D.J.H.; Chyan, C.-L.; Tzen, J.T.C.; Chou, W.-M. Molecular Cloning, Expression, and Functional Characterization of a Cystatin from Pineapple Stem. Biosci. Biotechnol. Biochem. 2004, 68, 1681–1689, doi:10.1271/bbb.68.1681.
102. Belenghi, B.; Acconcia, F.; Trovato, M.; Perazzolli, M.; Bocedi, A.; Polticelli, F.; Ascenzi, P.; Delledonne, M. AtCYS1, a Cystatin from Arabidopsis thaliana, Suppresses Hypersensitive Cell Death. Eur. J. Biochem. 2003, 270, 2593–2604, doi:10.1046/j.1432-1033.2003.03630.x.
103. Jerala, R.; Trstenjak, M.; Lenarčič, B.; Turk, V. Cloning a Synthetic Gene for Human Stefin B and Its Expression in E. Coli. FEBS Lett. 1988, 239, 41–44, doi:10.1016/0014-5793(88)80541-6.
